# Supplementary material for: A rational design of copper–selenium nanoclusters that cures sepsis by consuming endogenous H2S to trigger photothermal therapy and ROS burst
Source: Royal Society of Chemistry journal article supplement (doi:10.1039/d2bm00172a), 2022-01-01
Supplement: d2bm00172a1.pdf [file d2bm00172a1.pdf]

## Supporting Information

# Rational Design of Copper-Selenium Nanoclusters Cures Sepsis by Consuming Endogenous H<sub>2</sub>S to Trigger Photothermal Therapy and ROS Burst

Yin Gao<sup>a, 1</sup>, Zekun Wang<sup>a, 1</sup>, Yuqing Li<sup>a</sup>, Jie Yang<sup>a</sup>, Ziyu Liao<sup>a</sup>, Jing Liu<sup>a</sup>, Feng Guo<sup>a</sup>, Endong Yang<sup>a</sup>, Weiyun Wang<sup>a</sup>, Dongdong Sun<sup>a, \*</sup>

*a School of Life Sciences, Anhui Agricultural University, Hefei 230036, China*

*1 These authors contributed equally to this work.*

*\* Corresponding authors. E-mail addresses: sunddwj@126.com (D. Sun).*

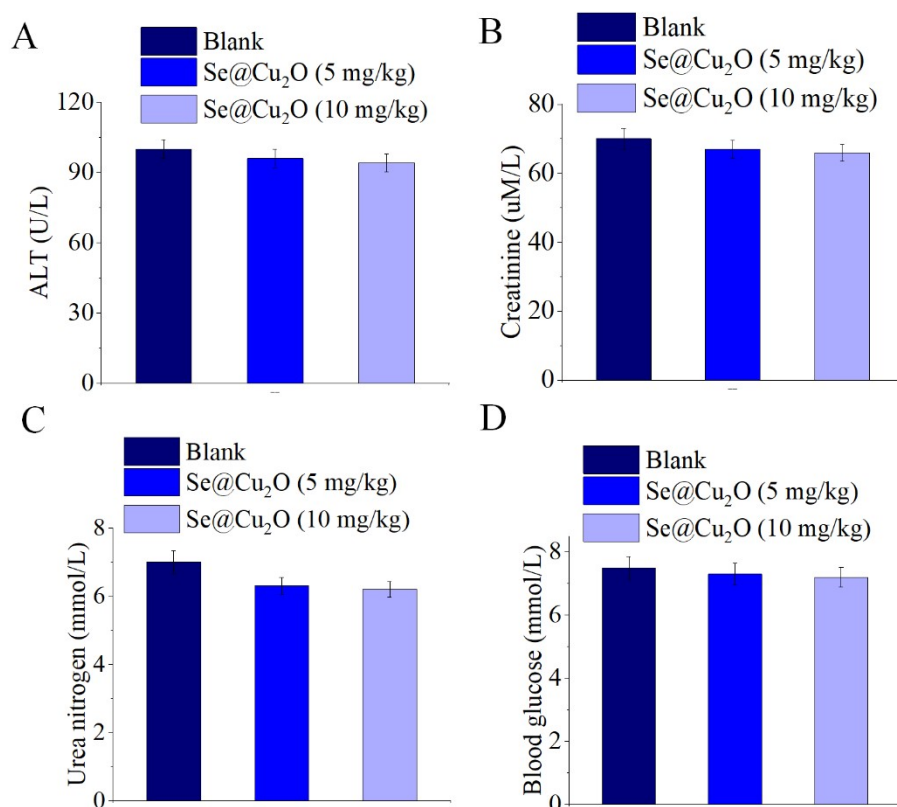

Figure S1: The automatic blood analyzer analyzes the ALT (A), creatinine (B), urea nitrogen (C) and blood sugar (D) levels of mice in the control group, Se@Cu<sub>2</sub>O (5 mg/kg) group and Se@Cu<sub>2</sub>O (10 mg/kg) group.
